# Supplementary material for: Loss of γ-cytoplasmic actin triggers myofibroblast transition of human epithelial cells
Source: PubMed Central journal article supplement — Mol Biol Cell. 2014 Oct 15;25(20):3133–46. doi: 10.1091/mbc.E14-03-0815 (PMC4196865; doi:10.1091/mbc.e14-03-0815), 2014-10-15

# Supplemental Materials

*Molecular Biology of the Cell*

Lechuga et al.

### **Supplemental Figure Legends.**

**Suppl. Figure 1. TGF $\beta$ -induced EMT in control and cytoplasmic actin isoform-depleted epithelial cells.** A549 cells were transfected with control,  $\beta$ -CYA, or  $\gamma$ -CYA-specific siRNA SmartPools and on day 2 post-transfection were treated for another 48 h with either vehicle or TGF $\beta$  (10 ng/ml). The effect of TGF $\beta$  treatment (**A**) or  $\gamma$ -CYA depletion (**B**) on the morphology of A549 cells was examined by bright field microscopy. (**C**) Expression of cytoplasmic actins and different EMT markers in actin isoform depleted cells, with or without TGF $\beta$  exposure, was determined by immunoblotting.

**Suppl. Figure 2. Depletion of  $\gamma$ -CYA induced expression of EMyT markers in multiple epithelial cell types.** 293 HEK, PANC1, and SW13 epithelial cells were transfected with either control, or  $\gamma$ -CYA-specific siRNA duplexes (D1 and D2), and expression of EMyT markers was analyzed by immunoblotting.

**Suppl. Figure 3. Depletion of  $\gamma$ -CYA inhibits expression of early response genes.** A549 cells were transfected with either control or  $\gamma$ -CYA- siRNA duplexes 2 and expression of early response genes was analyzed with quantitative real-time RT-PCR at different time points after transfection. Expression of all early response genes is normalized by the expression of a housekeeping gene. Data is presented as mean  $\pm$  SE (n=3); \*P<0.05, \*\*P<0.005, \*\*\*P<0.0005.

**Suppl. Figure 4. Nuclear translocation of MRTF-A and MRTF-B in  $\gamma$ -CYA depleted epithelial cells.** (**A,B**) Control or  $\gamma$ -CYA-depleted A549 cells were transfected with FLAG-tagged MRTF-A and MRTF-B with subsequent immunolabeling with anti-FLAG antibody. (**C**) Localization of endogenous MRTF-B in control or  $\gamma$ -CYA-depleted A549 cells was determined

by immunofluorescent labeling and confocal microscopy. Arrows indicate nuclear localization of MRTF-A and MRTF-B in  $\gamma$ -CYA-depleted cells.

**A**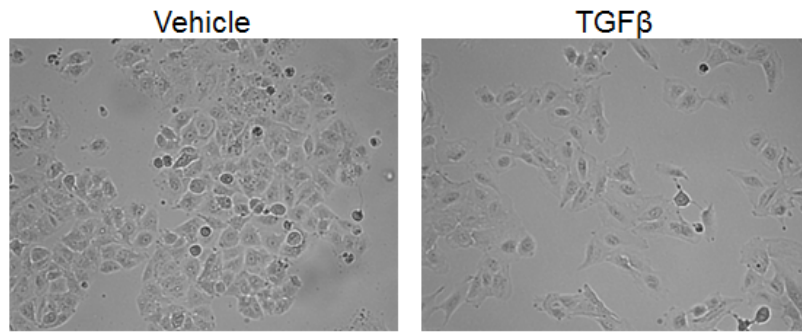**B**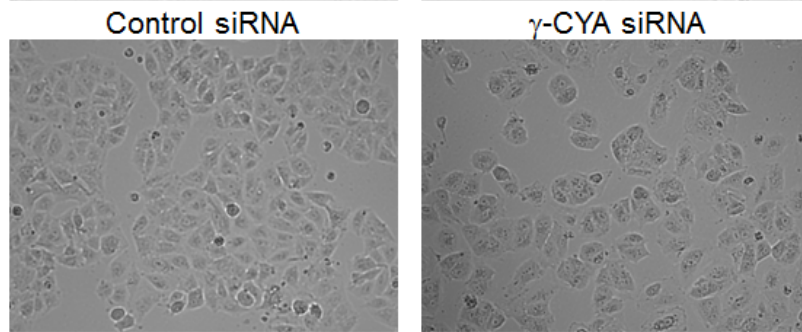**C**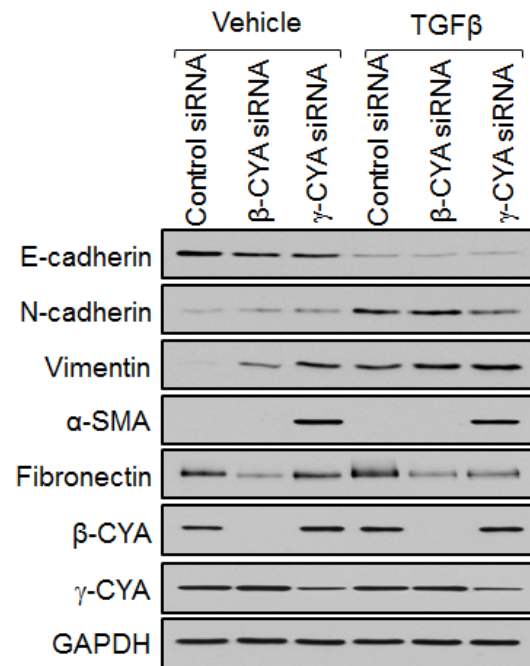



□ Control siRNA  
■  $\gamma$ -CYA siRNA

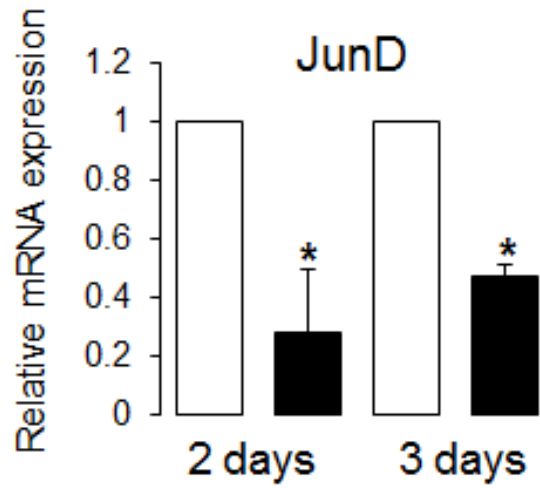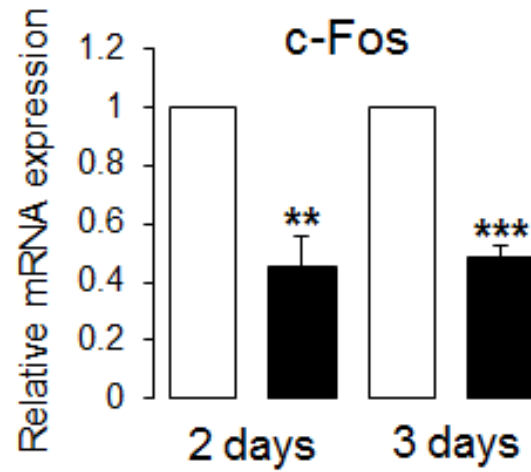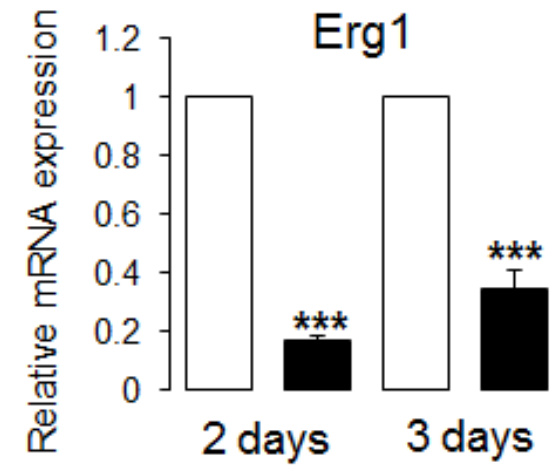

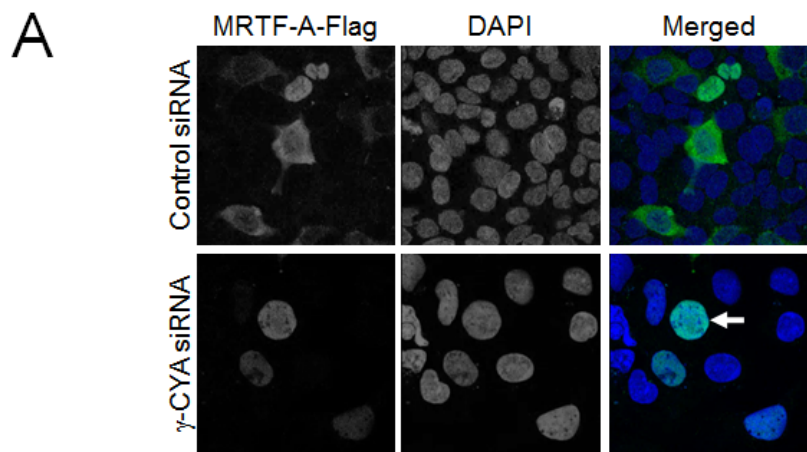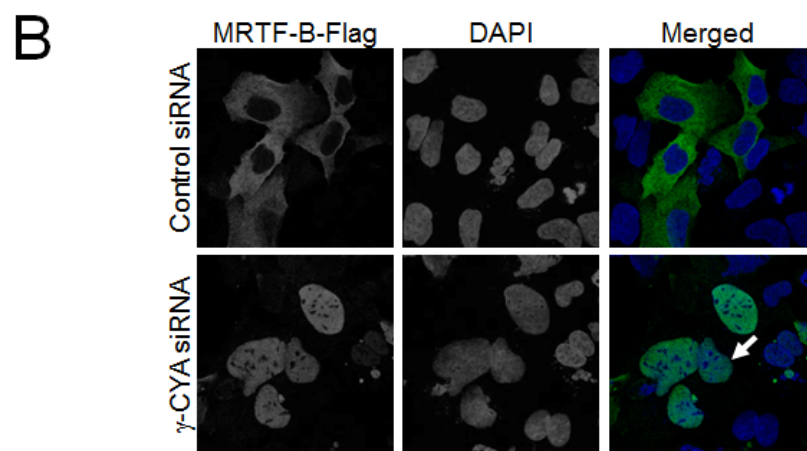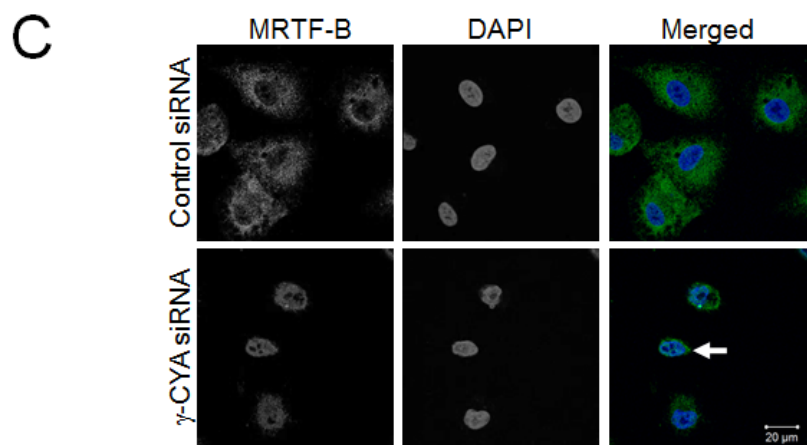

Supplement: supp_E14-03-0815v1_CombinedSupMats.pdf [file supp_E14-03-0815v1_CombinedSupMats.pdf]
